# Supplementary material for: Simultaneous single-cell three-dimensional genome and gene expression profiling uncovers dynamic enhancer connectivity underlying olfactory receptor choice
Source: PubMed Central journal article supplement (PMC11166570; doi:10.1038/s41592-024-02239-0), 2024-04-15
Supplement: 41592_2024_2239_MOESM1_ESM.pdf [file 41592_2024_2239_MOESM1_ESM.pdf]

## Reporting Summary

Nature Portfolio wishes to improve the reproducibility of the work that we publish. This form provides structure for consistency and transparency in reporting. For further information on Nature Portfolio policies, see our [Editorial Policies](#) and the [Editorial Policy Checklist](#).

### Statistics

For all statistical analyses, confirm that the following items are present in the figure legend, table legend, main text, or Methods section.

- | n/a                                 | Confirmed                                                                                                                                                                                                                                                                                      |
|-------------------------------------|------------------------------------------------------------------------------------------------------------------------------------------------------------------------------------------------------------------------------------------------------------------------------------------------|
| <input type="checkbox"/>            | <input checked="" type="checkbox"/> The exact sample size ( $n$ ) for each experimental group/condition, given as a discrete number and unit of measurement                                                                                                                                    |
| <input type="checkbox"/>            | <input checked="" type="checkbox"/> A statement on whether measurements were taken from distinct samples or whether the same sample was measured repeatedly                                                                                                                                    |
| <input type="checkbox"/>            | <input checked="" type="checkbox"/> The statistical test(s) used AND whether they are one- or two-sided<br><i>Only common tests should be described solely by name; describe more complex techniques in the Methods section.</i>                                                               |
| <input checked="" type="checkbox"/> | <input type="checkbox"/> A description of all covariates tested                                                                                                                                                                                                                                |
| <input checked="" type="checkbox"/> | <input type="checkbox"/> A description of any assumptions or corrections, such as tests of normality and adjustment for multiple comparisons                                                                                                                                                   |
| <input type="checkbox"/>            | <input checked="" type="checkbox"/> A full description of the statistical parameters including central tendency (e.g. means) or other basic estimates (e.g. regression coefficient) AND variation (e.g. standard deviation) or associated estimates of uncertainty (e.g. confidence intervals) |
| <input type="checkbox"/>            | <input checked="" type="checkbox"/> For null hypothesis testing, the test statistic (e.g. $F$ , $t$ , $r$ ) with confidence intervals, effect sizes, degrees of freedom and $P$ value noted<br><i>Give <math>P</math> values as exact values whenever suitable.</i>                            |
| <input checked="" type="checkbox"/> | <input type="checkbox"/> For Bayesian analysis, information on the choice of priors and Markov chain Monte Carlo settings                                                                                                                                                                      |
| <input checked="" type="checkbox"/> | <input type="checkbox"/> For hierarchical and complex designs, identification of the appropriate level for tests and full reporting of outcomes                                                                                                                                                |
| <input type="checkbox"/>            | <input checked="" type="checkbox"/> Estimates of effect sizes (e.g. Cohen's $d$ , Pearson's $r$ ), indicating how they were calculated                                                                                                                                                         |

*Our web collection on [statistics for biologists](#) contains articles on many of the points above.*

### Software and code

Policy information about [availability of computer code](#)

|                 |                                                                                                                                                                                                                                                                                                                                                                                                                                                                                                                                                                                                                                                                                                                                                                                                                                                                                                                                                                                                                                                           |
|-----------------|-----------------------------------------------------------------------------------------------------------------------------------------------------------------------------------------------------------------------------------------------------------------------------------------------------------------------------------------------------------------------------------------------------------------------------------------------------------------------------------------------------------------------------------------------------------------------------------------------------------------------------------------------------------------------------------------------------------------------------------------------------------------------------------------------------------------------------------------------------------------------------------------------------------------------------------------------------------------------------------------------------------------------------------------------------------|
| Data collection | No software was used.                                                                                                                                                                                                                                                                                                                                                                                                                                                                                                                                                                                                                                                                                                                                                                                                                                                                                                                                                                                                                                     |
| Data analysis   | <p>10X scRNA-seq data were analyzed with Cell Ranger (v 5.0.1) and Seurat (v 4.0.4).<br/> METATAC data were processed with custom scripts (<a href="https://github.com/sunneyxielab/METATAC_pipeline">https://github.com/sunneyxielab/METATAC_pipeline</a>) and further analyzed with ArchR (v1.0.2).<br/> LiMCA RNA data were analyzed with Seurat (v4.2.0).<br/> LiMCA Hi-C data were processed and analyzed with dip-c and hickit (r291) package (<a href="https://github.com/tanlongzhi/dip-c">https://github.com/tanlongzhi/dip-c</a>, <a href="https://github.com/lh3/hickit">https://github.com/lh3/hickit</a>).<br/> 3D genome structures were visualized with PyMol (v2.4.0). All plots were generated with matplotlib (v3.7.0) and ggplot2 (v3.3.3).<br/> Custom code related to this paper is available at <a href="https://github.com/zhang-jiankun/LiMCA">https://github.com/zhang-jiankun/LiMCA</a>.<br/> Flow cytometry was analyzed with BD FACSDiva v9.0 Software.<br/> Circos plot was generated with R package circlize (v0.4.12).</p> |

For manuscripts utilizing custom algorithms or software that are central to the research but not yet described in published literature, software must be made available to editors and reviewers. We strongly encourage code deposition in a community repository (e.g. GitHub). See the Nature Portfolio [guidelines for submitting code & software](#) for further information.

## Data

Policy information about [availability of data](#)

All manuscripts must include a [data availability statement](#). This statement should provide the following information, where applicable:

- Accession codes, unique identifiers, or web links for publicly available datasets
- A description of any restrictions on data availability
- For clinical datasets or third party data, please ensure that the statement adheres to our [policy](#)

Raw sequencing data generated in this study has been deposited to the Sequence Read Archive (SRA; <https://www.ncbi.nlm.nih.gov/sra>) under accession number PRJNA1002315. The processed data generated during this study has been uploaded to the Gene Expression Omnibus under accession number GSE240128. Cell type of each cluster was annotated manually with the help of Enrichr database (<https://doi.org/10.1093/nar/gkw377>). Published MOE Dip-C data was downloaded under GEO accession code GSE121791. Published OSN bulk Hi-C data was downloaded from 4DN database (<https://data.4dnucleome.org/>).

## Human research participants

Policy information about [studies involving human research participants and Sex and Gender in Research](#).

|                             |                                                                        |
|-----------------------------|------------------------------------------------------------------------|
| Reporting on sex and gender | Not applicable. There is no human participants involved in this study. |
| Population characteristics  | Not applicable.                                                        |
| Recruitment                 | Not applicable.                                                        |
| Ethics oversight            | Not applicable.                                                        |

Note that full information on the approval of the study protocol must also be provided in the manuscript.

## Field-specific reporting

Please select the one below that is the best fit for your research. If you are not sure, read the appropriate sections before making your selection.

- Life sciences       Behavioural & social sciences       Ecological, evolutionary & environmental sciences

For a reference copy of the document with all sections, see [nature.com/documents/nr-reporting-summary-flat.pdf](https://nature.com/documents/nr-reporting-summary-flat.pdf)

## Life sciences study design

All studies must disclose on these points even when the disclosure is negative.

|                 |                                                                                                                                                                                                                                                                                                                                                                                                                                                                                                                                                                                                                |
|-----------------|----------------------------------------------------------------------------------------------------------------------------------------------------------------------------------------------------------------------------------------------------------------------------------------------------------------------------------------------------------------------------------------------------------------------------------------------------------------------------------------------------------------------------------------------------------------------------------------------------------------|
| Sample size     | Sample size was not predetermined. For single-cell joint chromatin architecture and gene expression multi-omics data, it consisting of four cell lines, which includes 220 GM12878 cells, 63 K562 cells, 42 eHAP cells and 63 BJ cells, and 411 cells dissociated from the mouse main olfactory epithelium. For single-cell chromatin accessibility data, we profiled 11,880 single cells from the mouse main olfactory epithelium during the first postnatal month. For single-cell RNA-seq data, we collected 73,577 single cells from the mouse main olfactory epithelium during the first postnatal month. |
| Data exclusions | For the statistic analysis of spatial relationship between expressed ORs and their enhancers in Figure3, several cells were excluded due the unknown allele of expressed ORs of bad quality of 3D structures, as listed in supplementary table 4.                                                                                                                                                                                                                                                                                                                                                              |
| Replication     | For single-cell ATAC-seq data, each mouse age was generated with two independent sampling replicates. All attempts at replication were successful.                                                                                                                                                                                                                                                                                                                                                                                                                                                             |
| Randomization   | Randomization was not required since our study is based on sequencing. For different group analysis, cells were allocated according to expression level OR the stage of olfactory receptor expression. Random grouping control was down in these analysis to confirm the conclusion.                                                                                                                                                                                                                                                                                                                           |
| Blinding        | Blinding was not required since our sample is taken from wild-type mice or normal cultured cell line. Since the mice was not genetically engineered and cell line was taken from normal culture with perturbation.                                                                                                                                                                                                                                                                                                                                                                                             |

## Reporting for specific materials, systems and methods

We require information from authors about some types of materials, experimental systems and methods used in many studies. Here, indicate whether each material, system or method listed is relevant to your study. If you are not sure if a list item applies to your research, read the appropriate section before selecting a response.

## Materials & experimental systems

## Methods

- n/a  Involved in the study
- Antibodies
- Eukaryotic cell lines
- Palaeontology and archaeology
- Animals and other organisms
- Clinical data
- Dual use research of concern

- n/a  Involved in the study
- ChIP-seq
- Flow cytometry
- MRI-based neuroimaging

## Eukaryotic cell lines

Policy information about [cell lines and Sex and Gender in Research](#)

|                                                                   |                                                                                                                                                                                                                                                                                                                                                                                                                                                                                                                 |
|-------------------------------------------------------------------|-----------------------------------------------------------------------------------------------------------------------------------------------------------------------------------------------------------------------------------------------------------------------------------------------------------------------------------------------------------------------------------------------------------------------------------------------------------------------------------------------------------------|
| Cell line source(s)                                               | K-562 (ATCC) is derived from the pleural effusion of a 53-year-old female with chronic myelogenous leukemia in terminal blast crises. GM12878 (Coriell Institute) is a EBV-transformed B lymphocyte from a female. BJ (ATCC) cells are fibroblasts established from skin taken from normal foreskin from a neonatal male. eHAP (Cellosaurus) is haploid cell derived from HAP1, HAP1 is a near-haploid human cell line derived from KBM7, a human myeloid leukemia cell line developed from a 39-year-old male. |
| Authentication                                                    | All cell lines were validated with morphology and gene expression and other epigenetic states with published datasets.                                                                                                                                                                                                                                                                                                                                                                                          |
| Mycoplasma contamination                                          | Mycoplasma contamination test is negative.                                                                                                                                                                                                                                                                                                                                                                                                                                                                      |
| Commonly misidentified lines (See <a href="#">ICLAC</a> register) | No commonly misidentified cell lines were used in the study.                                                                                                                                                                                                                                                                                                                                                                                                                                                    |

## Animals and other research organisms

Policy information about [studies involving animals; ARRIVE guidelines](#) recommended for reporting animal research, and [Sex and Gender in Research](#)

|                         |                                                                                                                                                                            |
|-------------------------|----------------------------------------------------------------------------------------------------------------------------------------------------------------------------|
| Laboratory animals      | Female and male, postnatal day 3-120, CAST/Eij x C57BL/6J hybrid mice, female and male, postnatal day 1-60, DBA/2J x c57BL/6J hybrid mice.                                 |
| Wild animals            | No wild animals were used.                                                                                                                                                 |
| Reporting on sex        | Both female and male mice were used. The conclusion derived from this study is not biased to specific sex.                                                                 |
| Field-collected samples | No field-collected samples were used.                                                                                                                                      |
| Ethics oversight        | The study was approved by the Peking University Institutional Animal Care and Use Committee (IACUC). All the animal experiments were conducted following their guidelines. |

Note that full information on the approval of the study protocol must also be provided in the manuscript.

## Flow Cytometry

### Plots

Confirm that:

- The axis labels state the marker and fluorochrome used (e.g. CD4-FITC).
- The axis scales are clearly visible. Include numbers along axes only for bottom left plot of group (a 'group' is an analysis of identical markers).
- All plots are contour plots with outliers or pseudocolor plots.
- A numerical value for number of cells or percentage (with statistics) is provided.

### Methodology

|                    |                                                                                                                                                                                                                                                                                         |
|--------------------|-----------------------------------------------------------------------------------------------------------------------------------------------------------------------------------------------------------------------------------------------------------------------------------------|
| Sample preparation | The mouse main olfactory epithelium was dissociated into single cell suspension with papain. The single-cell suspension was filtered with 40 um strainer. Then 50000 cells were aliquot to ATAC-seq procedure, briefly, cells were permeabilized and transposed, then stain with 7-AAD. |
|--------------------|-----------------------------------------------------------------------------------------------------------------------------------------------------------------------------------------------------------------------------------------------------------------------------------------|

|                           |                                                                                                                                                                                                            |
|---------------------------|------------------------------------------------------------------------------------------------------------------------------------------------------------------------------------------------------------|
| Instrument                | BD, FACS Aria SORP                                                                                                                                                                                         |
| Software                  | BD FACSDiva v9.0 Software                                                                                                                                                                                  |
| Cell population abundance | All nuclei were sorted without biased, the 7-AAD-positive nuclei was selected.                                                                                                                             |
| Gating strategy           | Nuclei were distinguished from debris based on FSC-A and SSC-A, then the multiplets were removed by two step gating of FSC-W and FSC-H, SSC-W and SSC-H. Then nuclei were selected based on PerCP-cy5-5-A. |

Tick this box to confirm that a figure exemplifying the gating strategy is provided in the Supplementary Information.
